# Supplementary material for: White light emission from co-doped La2Hf2O7nanoparticles with suppressed host → Eu3+energy transferviaa U6+co-dopant
Source: Royal Society of Chemistry journal article supplement (doi:10.1039/d1qi00134e), 2021-01-01
Supplement: d1qi00134e1.pdf [file d1qi00134e1.pdf]

## Electronic Supplementary Information

### White light emission from co-doped $\text{La}_2\text{Hf}_2\text{O}_7$ nanoparticles with suppressed host $\rightarrow \text{Eu}^{3+}$ energy transfer via $\text{U}^{6+}$ co-dopant

Santosh K. Gupta<sup>1,4\*</sup>, Brindaban Modak<sup>2,4</sup>, Pampa Modak<sup>3,4</sup>, and Yuanbing Mao<sup>5\*</sup>

<sup>1</sup>Radiochemistry Division, Bhabha Atomic Research Centre, Trombay, Mumbai-400085, India

<sup>2</sup>Chemistry Division, Bhabha Atomic Research Centre, Trombay, Mumbai-400085, India

<sup>3</sup>Radiological Safety Division, Atomic Energy Regulatory Board, Anushaktinagar, Mumbai 400094, India

<sup>4</sup>Homi Bhabha National Institute, Anushaktinagar, Mumbai – 400094, India

<sup>5</sup>Department of Chemistry, Illinois Institute of Technology, 3101 South Dearborn Street, Chicago, IL 60616, USA

\*To whom correspondence should be addressed. Electronic mail: santoshg@barc.gov.in or santufrnd@gmail.com (SKG) and ymao17@iit.edu (YM). Tel.: +91-22-25590636 (SKG) and +1-312-567-3815 (YM).

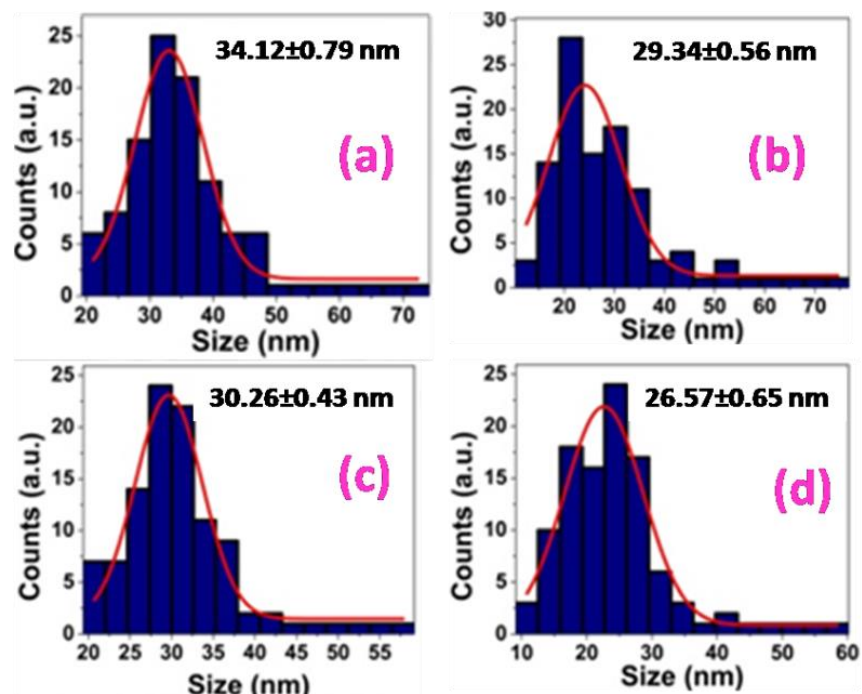

**Figure S1.** Particle size distribution histogram calculated from the FESEM images shown in Figure 3 using the ImageJ software.

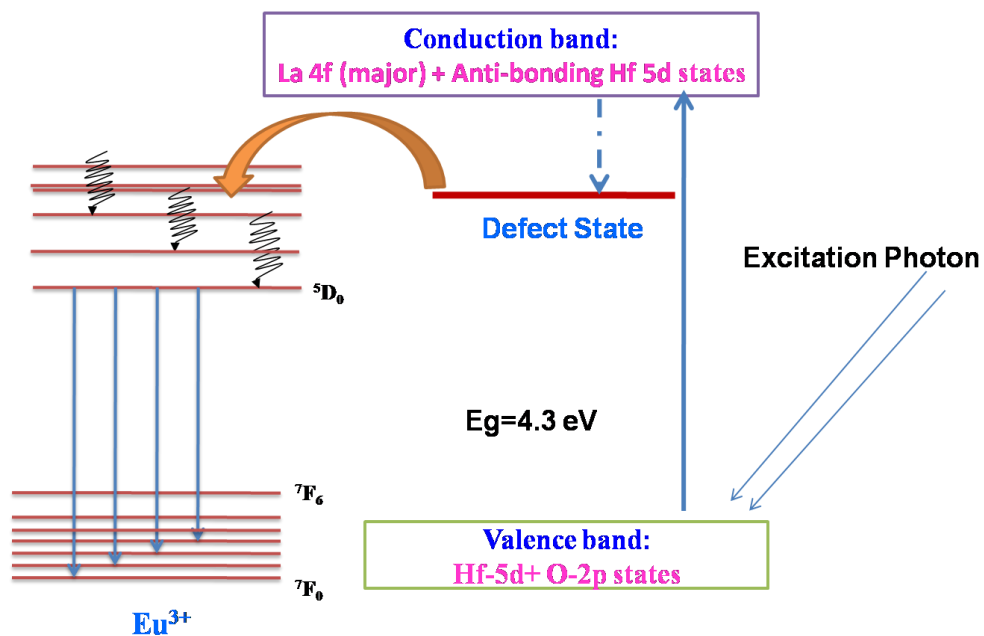

Figure S2. Mechanism of host sensitized energy transfer in the LHOE NPs.

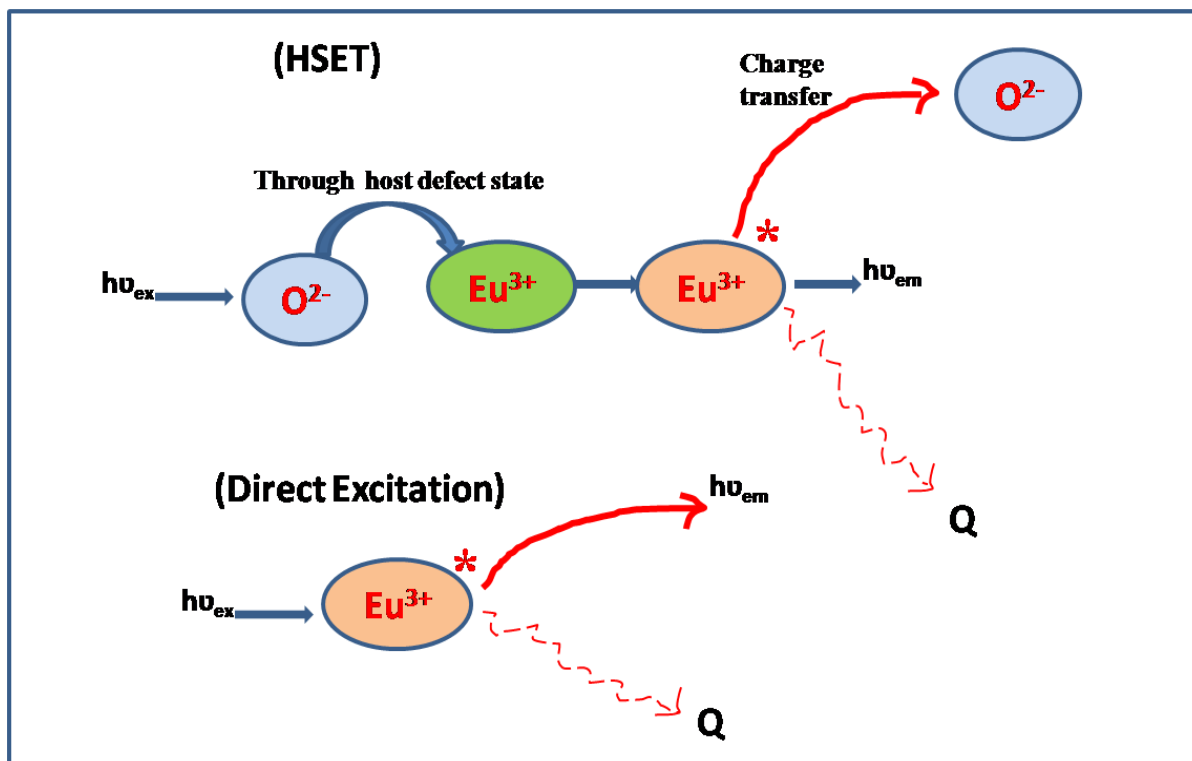

Figure S3. Proposed different PL mechanisms of  $\text{Eu}^{3+}$  in the LHOE and LHOEU NPs.

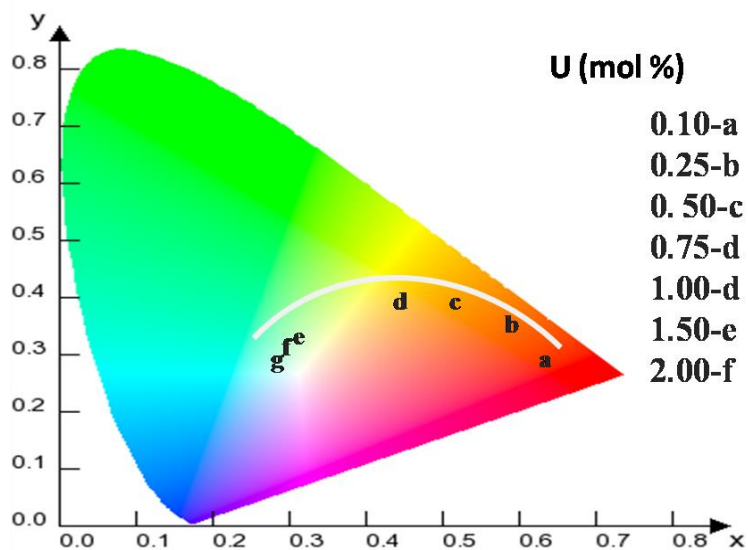

**Figure S4.** Color coordinate diagram of the LHOEU NPs with different uranium concentrations.

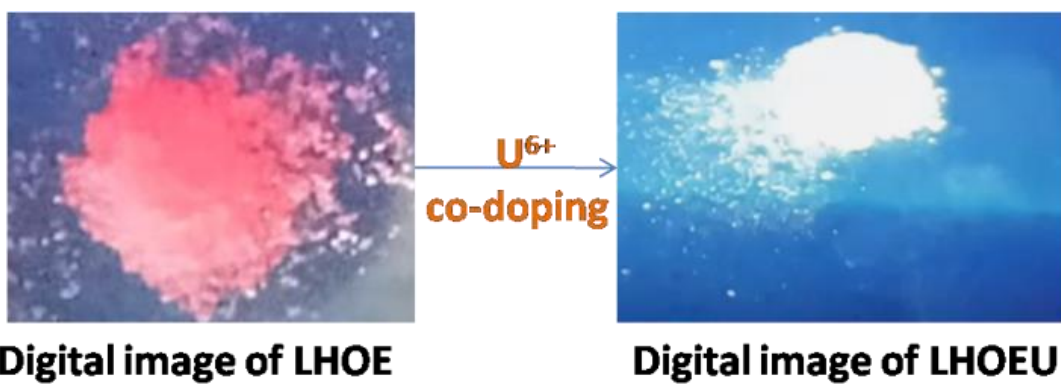

**Figure S5.** Digital images of the LHOE and LHOEU NPs under 305 nm excitation.
